# Supplementary material
Source: MDPI journal article supplement (https://www.mdpi.com/2304-6740/11/5/218)
Supplement: s1 [file s1]

**Supporting Information for**

# **Fluorescence Resonance Energy Transfer Properties and Auger Recombination Suppression in Supraparticles Self-Assembled from Colloidal Quantum Dots**

**Xinhua Tian <sup>1,2,†</sup>, Hao Chang <sup>1,†</sup>, Hongxing Dong <sup>1,3,4,\*</sup>, Chi Zhang <sup>3,5,\*</sup> and Long Zhang <sup>1,2,3,4,\*</sup>**

1 Key Laboratory of Materials for High-Power Laser, Shanghai Institute of Optics and Fine Mechanics,  
Chinese Academy of Sciences, Shanghai 201800, China

2 School of Physical and Technology, ShanghaiTech University, Shanghai 201210, China

3 School of Physics and Optoelectronic Engineering, Hangzhou Institute for Advanced Study,  
University of Chinese Academy of Sciences, Hangzhou 310024, China

4 CAS Center for Excellence in Ultra-intense Laser Science, Shanghai 201800, China

5 Department of Mechanical and Aerospace Engineering, University of Missouri, Columbia, MO 65211, USA

\* Correspondence: hongxingd@siom.ac.cn (H.D.); chizhang@ucas.ac.cn (C.Z.); lzhang@siom.ac.cn (L.Z.)

† These authors contributed equally to this work.

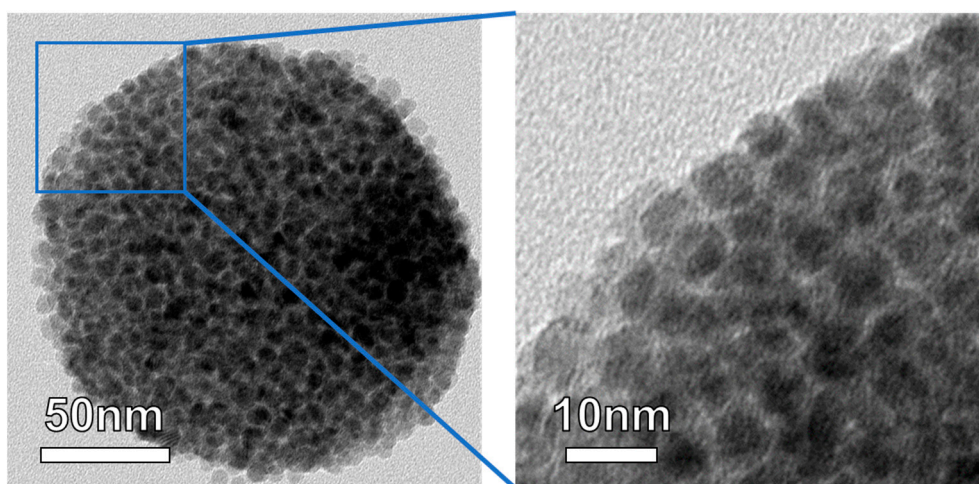

**Figure S1.** High resolution transmission electron microscopy image of SPs.

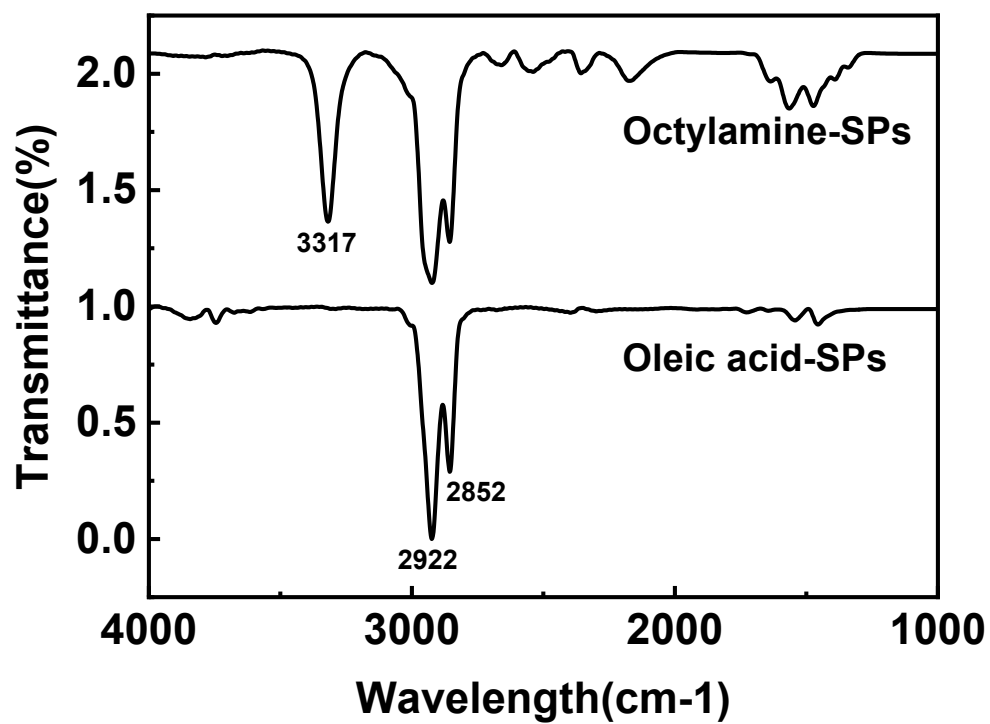

**Figure S2.** Fourier transform infrared spectroscopy spectra of OctA-SPs and OA-SPs.

**Table S1** Life decay curve fitting parameters at different wavelengths of 595-620 nm

| Wavelength(nm) | A <sub>1</sub> (%) | $\tau_1$ (ps) | A <sub>2</sub> (%) | $\tau_2$ (ps) |
|----------------|--------------------|---------------|--------------------|---------------|
| 595            | 58.891             | 52.49663      | 38.854             | 308.6004      |
| 600            | 52.399             | 53.41224      | 44.405             | 301.9325      |
| 605            | 45.166             | 54.65532      | 50.797             | 301.9542      |
| 610            | 39.077             | 57.93251      | 55.774             | 315.5416      |
| 615            | 34.66              | 61.97879      | 59.648             | 330.6701      |
| 620            | 33.457             | 64.7552       | 61.16              | 355.4469      |
